# Supplementary material for: Individual and Combined Risk Factors for Incident Atrial Fibrillation and Incident Stroke: An Analysis of 3 Million At-Risk US Patients
Source: PubMed Central journal article supplement — J Am Heart Assoc. 2015 Jul 23;4(7):e001723. doi: 10.1161/JAHA.114.001723 (PMC4608064; doi:10.1161/jaha.114.001723), 2015-07-23
Supplement: jah30004-e001723-sd1.pdf [file jah30004-e001723-sd1.pdf]

## SUPPLEMENTAL MATERIAL

### Appendix A. ICD-9 Codes Used for Diagnosis of AF or Stroke.

#### Atrial fibrillation

| ICD-9  | Code Description    |
|--------|---------------------|
| 427.31 | Atrial fibrillation |

#### Stroke

| ICD-9  | Type of Stroke            | Code Description                                                                              |
|--------|---------------------------|-----------------------------------------------------------------------------------------------|
| 430    | Hemorrhagic               | Subarachnoid hemorrhage                                                                       |
| 431    | Hemorrhagic               | Intracerebral hemorrhage                                                                      |
| 432.0  | Hemorrhagic               | Nontraumatic extradural hemorrhage                                                            |
| 432.1  | Hemorrhagic               | Subdural hemorrhage                                                                           |
| 432.9  | Hemorrhagic               | Unspecified intracranial hemorrhage                                                           |
| 433.01 | Ischemic                  | Occlusion and stenosis, basilar artery, with cerebral infarction                              |
| 433.11 | Ischemic                  | Occlusion and stenosis, carotid artery, with cerebral infarction                              |
| 433.21 | Ischemic                  | Occlusion and stenosis, vertebral artery, with cerebral infarction                            |
| 433.31 | Ischemic                  | Occlusion and stenosis, multiple and bilateral precerebral arteries, with cerebral infarction |
| 433.81 | Ischemic                  | Occlusion and stenosis, other specified precerebral artery, with cerebral infarction          |
| 433.91 | Ischemic                  | Occlusion and stenosis, unspecified precerebral artery, with cerebral infarction              |
| 434.01 | Ischemic                  | Cerebral thrombosis, with cerebral infarction                                                 |
| 434.11 | Ischemic                  | Cerebral embolism, with cerebral infarction                                                   |
| 434.91 | Ischemic                  | Cerebral artery occlusion, unspecified, with cerebral infarction                              |
| 997.02 | Ischemic                  | Iatrogenic cerebrovascular infarction or hemorrhage                                           |
| 435.8  | Transient ischemic attack | Other specified transient cerebral ischemia                                                   |
| 435.9  | Transient ischemic attack | Unspecified transient cerebral ischemia                                                       |

## Appendix B. ICD-9 Codes and Drug Classes Used for Risk Factor Identification

### Heart Failure

| ICD-9  | Code Description                                                                                                                                          |
|--------|-----------------------------------------------------------------------------------------------------------------------------------------------------------|
| 402.11 | Benign hypertensive heart disease with heart failure                                                                                                      |
| 402.91 | Unspecified hypertensive heart disease with heart failure                                                                                                 |
| 404.01 | Hypertensive heart and chronic kidney disease, malignant, with heart failure and with chronic kidney disease stage I through stage IV, or unspecified     |
| 404.03 | Hypertensive heart disease and chronic kidney disease, malignant, with heart failure and with chronic kidney disease stage V or end stage renal disease   |
| 404.11 | Hypertensive heart and chronic kidney disease, benign, with heart failure and with chronic kidney disease stage I through stage IV, or unspecified        |
| 404.13 | Hypertensive heart disease and chronic kidney disease, benign, with heart failure and with chronic kidney disease stage V or end stage renal disease      |
| 404.91 | Hypertensive heart and chronic kidney disease, unspecified, with heart failure and with chronic kidney disease stage I through stage IV, or unspecified   |
| 404.93 | Hypertensive heart disease and chronic kidney disease, unspecified, with heart failure and with chronic kidney disease stage V or end stage renal disease |
| 428.0  | Congestive heart failure, unspecified                                                                                                                     |
| 428.1  | Left heart failure                                                                                                                                        |
| 428.2  | Systolic heart failure, unspecified                                                                                                                       |
| 428.21 | Acute systolic heart failure                                                                                                                              |
| 428.22 | Chronic systolic heart failure                                                                                                                            |
| 428.23 | Acute on chronic systolic heart failure                                                                                                                   |
| 428.3  | Diastolic heart failure, unspecified                                                                                                                      |
| 428.31 | Acute diastolic heart failure                                                                                                                             |
| 428.32 | Chronic diastolic heart failure                                                                                                                           |
| 428.33 | Acute on chronic diastolic heart failure                                                                                                                  |
| 428.4  | Combined systolic and diastolic heart failure, unspecified                                                                                                |
| 428.41 | Acute combined systolic and diastolic heart failure                                                                                                       |
| 428.42 | Chronic combined systolic and diastolic heart failure                                                                                                     |
| 428.43 | Acute on chronic combined systolic and diastolic heart failure                                                                                            |
| 428.9  | Heart failure, unspecified                                                                                                                                |

### Hypertension

| ICD-9  | Code Description                                           |
|--------|------------------------------------------------------------|
| 401.0  | Malignant essential hypertension                           |
| 401.1  | Benign essential hypertension                              |
| 401.9  | Unspecified essential hypertension                         |
| 402.0  | Malignant hypertensive heart disease without heart failure |
| 402.1  | Benign essential hypertension without heart failure        |
| 402.9  | Unspecified essential hypertension without heart failure   |
| 405.01 | Malignant renovascular hypertension                        |
| 405.09 | Other malignant secondary hypertension                     |

|        |                                          |
|--------|------------------------------------------|
| 405.11 | Benign renovascular hypertension         |
| 405.19 | Other benign secondary hypertension      |
| 405.91 | Unspecified renovascular hypertension    |
| 405.99 | Other unspecified secondary hypertension |

### Therapeutic Classes for Hypertension

| Drug Class | Description                              |
|------------|------------------------------------------|
| 50         | Cardiac, alpha-beta blockers             |
| 51         | Cardiac, beta-blockers                   |
| 52         | Cardiac, calcium channel blockers        |
| 121        | Diuretics, miscellaneous                 |
| 122        | Diuretics, osmotic                       |
| 123        | Diuretics, potassium sparing             |
| 124        | Diuretics, thiazide and related          |
| 125        | Diuretics, carbonic anhydrase inhibitors |

### Diabetes Mellitus

| ICD-9  | Code Description                                                                                              |
|--------|---------------------------------------------------------------------------------------------------------------|
| 249.0  | Secondary diabetes mellitus without mention of complication, not stated as uncontrolled, or unspecified       |
| 249.01 | Secondary diabetes mellitus without mention of complication, uncontrolled                                     |
| 249.1  | Secondary diabetes mellitus with ketoacidosis, not stated as uncontrolled, or unspecified                     |
| 249.11 | Secondary diabetes mellitus with ketoacidosis, uncontrolled                                                   |
| 249.2  | Secondary diabetes mellitus with hyperosmolarity, not stated as uncontrolled, or unspecified                  |
| 249.21 | Secondary diabetes mellitus with hyperosmolarity, uncontrolled                                                |
| 249.3  | Secondary diabetes mellitus with other coma, not stated as uncontrolled, or unspecified                       |
| 249.31 | Secondary diabetes mellitus with other coma, uncontrolled                                                     |
| 249.4  | Secondary diabetes mellitus with renal manifestations, not stated as uncontrolled, or unspecified             |
| 249.41 | Secondary diabetes mellitus with renal manifestations, uncontrolled                                           |
| 249.5  | Secondary diabetes mellitus with ophthalmic manifestations, not stated as uncontrolled, or unspecified        |
| 249.51 | Secondary diabetes mellitus with ophthalmic manifestations, uncontrolled                                      |
| 249.6  | Secondary diabetes mellitus with neurological manifestations, not stated as uncontrolled, or unspecified      |
| 249.61 | Secondary diabetes mellitus with neurological manifestations, uncontrolled                                    |
| 249.7  | Secondary diabetes mellitus with peripheral circulatory disorders, not stated as uncontrolled, or unspecified |
| 249.71 | Secondary diabetes mellitus with peripheral circulatory disorders, uncontrolled                               |
| 249.8  | Secondary diabetes mellitus with other specified manifestations, not stated as uncontrolled, or unspecified   |
| 249.81 | Secondary diabetes mellitus with other specified manifestations, uncontrolled                                 |
| 249.9  | Secondary diabetes mellitus with unspecified complication, not stated as uncontrolled, or unspecified         |
| 249.91 | Secondary diabetes mellitus with unspecified complication, uncontrolled                                       |

|        |                                                                                                                  |
|--------|------------------------------------------------------------------------------------------------------------------|
| 250.0  | Diabetes mellitus without mention of complication, type II or unspecified type, not stated as uncontrolled       |
| 250.01 | Diabetes mellitus without mention of complication, type I [juvenile type], not stated as uncontrolled            |
| 250.02 | Diabetes mellitus without mention of complication, type II or unspecified type, uncontrolled                     |
| 250.03 | Diabetes mellitus without mention of complication, type I [juvenile type], uncontrolled                          |
| 250.1  | Diabetes mellitus with ketoacidosis, type II or unspecified type, not stated as uncontrolled                     |
| 250.11 | Diabetes mellitus with ketoacidosis, type I [juvenile type], not stated as uncontrolled                          |
| 250.12 | Diabetes mellitus with ketoacidosis, type II or unspecified type, uncontrolled                                   |
| 250.13 | Diabetes mellitus with ketoacidosis, type I [juvenile type], uncontrolled                                        |
| 250.2  | Diabetes mellitus with hyperosmolarity, type II or unspecified type, not stated as uncontrolled                  |
| 250.21 | Diabetes mellitus with hyperosmolarity, type I [juvenile type], not stated as uncontrolled                       |
| 250.22 | Diabetes mellitus with hyperosmolarity, type II or unspecified type, uncontrolled                                |
| 250.23 | Diabetes mellitus with hyperosmolarity, type I [juvenile type], uncontrolled                                     |
| 250.3  | Diabetes mellitus with other coma, type II or unspecified type, not stated as uncontrolled                       |
| 250.31 | Diabetes mellitus with other coma, type I [juvenile type], not stated as uncontrolled                            |
| 250.32 | Diabetes mellitus with other coma, type II or unspecified type, uncontrolled                                     |
| 250.33 | Diabetes mellitus with other coma, type I [juvenile type], uncontrolled                                          |
| 250.4  | Diabetes mellitus with renal manifestations, type II or unspecified type, not stated as uncontrolled             |
| 250.41 | Diabetes mellitus with renal manifestations, type I [juvenile type], not stated as uncontrolled                  |
| 250.42 | Diabetes mellitus with renal manifestations, type II or unspecified type, uncontrolled                           |
| 250.43 | Diabetes mellitus with renal manifestations, type I [juvenile type], uncontrolled                                |
| 250.5  | Diabetes mellitus with ophthalmic manifestations, type II or unspecified type, not stated as uncontrolled        |
| 250.51 | Diabetes mellitus with ophthalmic manifestations, type I [juvenile type], not stated as uncontrolled             |
| 250.52 | Diabetes mellitus with ophthalmic manifestations, type II or unspecified type, uncontrolled                      |
| 250.53 | Diabetes mellitus with ophthalmic manifestations, type I [juvenile type], uncontrolled                           |
| 250.6  | Diabetes mellitus with neurologic manifestations, type II or unspecified type, not stated as uncontrolled        |
| 250.61 | Diabetes mellitus with neurologic manifestations, type I [juvenile type], not stated as uncontrolled             |
| 250.62 | Diabetes mellitus with neurologic manifestations, type II or unspecified type, uncontrolled                      |
| 250.63 | Diabetes mellitus with neurologic manifestations, type I [juvenile type], uncontrolled                           |
| 250.7  | Diabetes mellitus with peripheral circulatory disorders, type II or unspecified type, not stated as uncontrolled |
| 250.71 | Diabetes mellitus with peripheral circulatory disorders, type I [juvenile type], not stated as uncontrolled      |
| 250.72 | Diabetes mellitus with peripheral circulatory disorders, type II or unspecified type, uncontrolled               |
| 250.73 | Diabetes mellitus with peripheral circulatory disorders, type I [juvenile type], uncontrolled                    |
| 250.8  | Diabetes mellitus with other specified manifestations, type II or unspecified type, not stated as uncontrolled   |
| 250.81 | Diabetes mellitus with specified manifestations, type I [juvenile type], not stated as uncontrolled              |
| 250.82 | Diabetes mellitus with specified manifestations, type II or unspecified type, uncontrolled                       |
| 250.83 | Diabetes mellitus with specified manifestations, type I [juvenile type], uncontrolled                            |
| 250.9  | Diabetes mellitus with unspecified complication, type II or unspecified type, not stated as uncontrolled         |
| 250.91 | Diabetes mellitus with unspecified complication, type I [juvenile type], not stated as uncontrolled              |

|        |                                                                                            |
|--------|--------------------------------------------------------------------------------------------|
| 250.92 | Diabetes mellitus with unspecified complication, type II or unspecified type, uncontrolled |
| 250.93 | Diabetes mellitus with unspecified complication, type I [juvenile type], uncontrolled      |

### Therapeutic Classes for Diabetes Mellitus

| Drug Class | Description                        |
|------------|------------------------------------|
| 172        | Antidiabetic agents, insulin       |
| 173        | Antidiabetic agents, sulfonylureas |
| 174        | Antidiabetic agents, miscellaneous |

### Coronary Artery Disease

| ICD-9  | Code Description                                                               |
|--------|--------------------------------------------------------------------------------|
| 414.0  | Coronary atherosclerosis of unspecified type of vessel, native or graft        |
| 414.01 | Coronary atherosclerosis of native coronary artery                             |
| 414.02 | Coronary atherosclerosis of autologous vein bypass graft                       |
| 414.03 | Coronary atherosclerosis of nonautologous biological bypass graft              |
| 414.04 | Coronary atherosclerosis of artery bypass graft                                |
| 414.05 | Coronary atherosclerosis of unspecified bypass graft                           |
| 414.06 | Coronary atherosclerosis of native coronary artery of transplanted heart       |
| 414.07 | Coronary atherosclerosis of bypass graft (artery) (vein) of transplanted heart |
| 414.2  | Chronic total occlusion of coronary artery                                     |
| 414.3  | Coronary atherosclerosis due to lipid rich plaque                              |
| 414.4  | Coronary atherosclerosis due to calcified coronary lesion                      |

### Chronic Kidney Disease

| ICD-9  | Code Description                                                                                                        |
|--------|-------------------------------------------------------------------------------------------------------------------------|
| 585.1  | Chronic kidney disease, Stage I                                                                                         |
| 585.2  | Chronic kidney disease, Stage II (mild)                                                                                 |
| 585.3  | Chronic kidney disease, Stage III (moderate)                                                                            |
| 585.4  | Chronic kidney disease, Stage IV (severe)                                                                               |
| 585.5  | Chronic kidney disease, Stage V                                                                                         |
| 585.6  | End stage renal disease                                                                                                 |
| 585.9  | Chronic kidney disease, unspecified                                                                                     |
| 403.0  | Hypertensive chronic kidney disease, malignant, with chronic kidney disease, stage I through stage IV, or unspecified   |
| 403.01 | Hypertensive chronic kidney disease, malignant, with chronic kidney disease, stage V or end stage renal disease         |
| 403.1  | Hypertensive chronic kidney disease, benign, with chronic kidney disease, stage I through stage IV, or unspecified      |
| 403.11 | Hypertensive chronic kidney disease, benign, with chronic kidney disease, stage V or end stage renal disease            |
| 403.9  | Hypertensive chronic kidney disease, unspecified, with chronic kidney disease, stage I through stage IV, or unspecified |
| 403.91 | Hypertensive chronic kidney disease, unspecified, with chronic kidney disease, stage V or end stage renal disease       |

|        |                                                                                                                                                      |
|--------|------------------------------------------------------------------------------------------------------------------------------------------------------|
| 404.0  | Hypertensive heart and chronic kidney disease, malignant, without heart failure and with chronic kidney disease stage I through IV, or unspecified   |
| 404.02 | Hypertensive heart and chronic kidney disease, malignant, without heart failure and with chronic kidney disease stage V or end stage renal disease   |
| 404.1  | Hypertensive heart and chronic kidney disease, benign, without heart failure and with chronic kidney disease stage I through IV, or unspecified      |
| 404.12 | Hypertensive heart and chronic kidney disease, benign, without heart failure and with chronic kidney disease stage V or end stage renal disease      |
| 404.9  | Hypertensive heart and chronic kidney disease, unspecified, without heart failure and with chronic kidney disease stage I through IV, or unspecified |
| 404.92 | Hypertensive heart and chronic kidney disease, unspecified, without heart failure and with chronic kidney disease stage V or end stage renal disease |

## Appendix C. Codes Used for Identification of Symptoms, Additional Comorbid Condition, and External Cardiac Monitoring

### Symptom Codes

| ICD-9  | Type of Symptom | Code Description                              |
|--------|-----------------|-----------------------------------------------|
| 786.50 | Chest pain      | Chest pain, unspecified                       |
| 786.51 | Chest pain      | Precordial pain                               |
| 786.52 | Chest pain      | Painful respiration                           |
| 786.59 | Chest pain      | Other chest pain                              |
| 780.4  | Dizziness       | Dizziness or vertigo, not otherwise specified |
| 785.1  | Palpitations    | Palpitations                                  |
| 785.0  | Tachycardia     | Tachycardia                                   |
| 786.00 | Respiratory     | Dyspnea and respiratory abnormalities         |
| 786.05 | Respiratory     | Shortness of breath                           |
| 786.09 | Respiratory     | Other respiratory abnormalities               |

### Additional Comorbid Condition Codes

| ICD-9  | Type of Condition | Code Description                                      |
|--------|-------------------|-------------------------------------------------------|
| 327.2  | Sleep apnea       | Organic sleep apnea, not otherwise specified          |
| 327.23 | Sleep apnea       | Obstructive sleep apnea                               |
| 780.51 | Sleep apnea       | Insomnia with sleep apnea, not otherwise specified    |
| 780.53 | Sleep apnea       | Hypersomnia with sleep apnea, not otherwise specified |
| 780.57 | Sleep apnea       | Sleep apnea, not otherwise specified                  |

### External Cardiac Monitoring Codes

| CPT Code | Type of Monitoring                  | Code Description                                                                                                                                                                                                                                                                                                                                                                       |
|----------|-------------------------------------|----------------------------------------------------------------------------------------------------------------------------------------------------------------------------------------------------------------------------------------------------------------------------------------------------------------------------------------------------------------------------------------|
| 93228    | Mobile cardiac outpatient telemetry | Wearable mobile cardiovascular telemetry with electrocardiographic recording, concurrent computerized real time data analysis and greater than 24 hours of accessible ECG data storage (retrievable with query) with ECG triggered and patient selected events transmitted to a remote attended surveillance center for up to 30 days; physician review and interpretation with report |
| 93229    | Mobile cardiac outpatient telemetry | Technical support for connection and patient instructions for use, attended surveillance, analysis and physician prescribed transmission of daily and emergent data reports                                                                                                                                                                                                            |
| 93268    | Loop monitor                        | Wearable patient activated electrocardiographic rhythm derived multiple event recording with pre-symptom memory loop, 24-hour attended monitoring, per 30 day period of time; includes transmission, physician review and interpretation                                                                                                                                               |
| 93270    | Loop monitor                        | Connection, recording and disconnection of an external device                                                                                                                                                                                                                                                                                                                          |
| 93271    | Loop monitor                        | Monitoring, receipt of transmissions, and analysis                                                                                                                                                                                                                                                                                                                                     |
| 93272    | Loop monitor                        | Physician review and interpretation of EKG strips                                                                                                                                                                                                                                                                                                                                      |
| 93224    | Holter monitor                      | Electrocardiographic monitoring for 24 hours by continuous original ECG waveform recording and storage, with visual superimposition scanning;                                                                                                                                                                                                                                          |

|       |                |                                                                                                                                                                                                          |
|-------|----------------|----------------------------------------------------------------------------------------------------------------------------------------------------------------------------------------------------------|
|       |                | includes recording, scanning analysis with report, physician review and interpretation                                                                                                                   |
| 93225 | Holter monitor | Electrocardiographic monitoring for 24 hours by continuous original ECG waveform recording and storage, with visual superimposition scanning; recording (includes hook-up, recording, and disconnection) |
| 93226 | Holter monitor | Electrocardiographic monitoring for 24 hours by continuous original ECG waveform recording and storage, with visual superimposition scanning; scanning analysis with report                              |
| 93227 | Holter monitor | Electrocardiographic monitoring for 24 hours by continuous original ECG waveform recording and storage, with visual superimposition scanning; physician review and interpretation                        |



## Appendix D. Additional Baseline Patient Characteristics

| Baseline Characteristics           | High-risk Subcohort<br>(N= 1,851,653)<br>Count (%) | Low-risk Subcohort<br>(N= 1,156,221)<br>Count (%) | Combined Population for Multivariable Analysis<br>(N= 3,007,874)<br>Count (%) |
|------------------------------------|----------------------------------------------------|---------------------------------------------------|-------------------------------------------------------------------------------|
| <b>Region</b>                      |                                                    |                                                   |                                                                               |
| Northeast                          | 173,774 (9.4%)                                     | 120,171 (10.4%)                                   | 293,945 (9.8%)                                                                |
| North Central                      | 663,462 (35.8%)                                    | 361,661 (31.3%)                                   | 1,025,123 (34.1%)                                                             |
| South                              | 710,288 (38.4%)                                    | 433,469 (37.5%)                                   | 1,143,757 (38.0%)                                                             |
| West                               | 299,454 (16.2%)                                    | 236,082 (20.4%)                                   | 535,536 (17.8%)                                                               |
| Unknown                            | 4,675 (0.3%)                                       | 4,838 (0.4%)                                      | 9,513 (0.3%)                                                                  |
| <b>External Cardiac Monitoring</b> |                                                    |                                                   |                                                                               |
| MCOT*, Loop, or Holter             | 27,303 (1.5%)                                      | 6,140 (0.5%)                                      | 33,443 (1.1%)                                                                 |

\*MCOT = mobile cardiac outpatient telemetry
